# Supplementary material
Source: PubMed Central journal article supplement (PMC3207439)
Supplement: supp_M111.277681_jbc.M111.277681-1.pdf [file supp_M111.277681_jbc.M111.277681-1.pdf]

## Supplemental information

### Supplemental tables

**Table S1.** Enzyme names and DNA primers used in PCR amplification and cloning

| Gene name  | EC Number    | Enzyme      | Oligo name               | DNA sequence                                      |
|------------|--------------|-------------|--------------------------|---------------------------------------------------|
| ST6GAL1    | EC:2.4.99.1  | ST6Gal-I    | Forward- <i>Hind</i> III | AAAAA AAGCTT ATGATTACACCAACCTG                    |
|            |              |             | Reverse- <i>Xba</i> I    | AAAAA TCTAGA GCAGTGAATGGTCCG                      |
| B4GALT1    | EC:2.4.1.22  | GalT-I      | Forward- <i>Hind</i> III | AAAAA AAGCTT ATGAGGCTTCGGGAG                      |
|            |              |             | Reverse- <i>Xba</i> I    | AAAAA TCTAGA CTTGCTGGTGTCCC                       |
| MGAT1      | EC:2.4.1.101 | GlcNAcT-I   | Forward- <i>Bam</i> HI   | AAAAA GGATCC ATGCTGAAGAAGCAGTCTG                  |
|            |              |             | Reverse- <i>Xba</i> I    | AAAAA TCTAGA ATTCCAGCTAGGATCATAGC                 |
| MGAT2      | EC:2.4.1.143 | GlcNAcT-II  | Forward- <i>Eco</i> RI   | AAAAA GAATTC CATGAGGTTCCGCATCTAC                  |
|            |              |             | Reverse- <i>Xba</i> I    | AAAAA TCTAGA CTGTGATTCCACTGCAGTC                  |
| ST3GAL3    | EC:2.4.99.6  | ST3Gal-III  | Forward- <i>Hind</i> III | AAAAA AAGCTT ATGGACTCTTGGTATTTGTG                 |
|            |              |             | Reverse- <i>Xba</i> I    | AAAAA TCTAGA GATGCCACTGCTTAGATCAG                 |
| GALNT6     | EC:2.4.1.41  | ppGalNAcT-6 | Forward- <i>Bam</i> HI   | AAAAA GGATCC ATGAGGCTCCTCCGCAGACG                 |
|            |              |             | Reverse- <i>Xho</i> I    | AAAAA CTCGAG GACAAAGAGCCACAACCTGATGGGGG           |
| GCNT1      | EC:2.4.1.102 | C2GNT-1     | Forward- <i>Bam</i> HI   | AAAAA GGATCC ATGGCTTTTCCCTGCCGCAGGTCCC            |
|            |              |             | Reverse- <i>Xba</i> I    | AAAAA CTCGAG GGAGACCCGGTGTCCCCGG                  |
| GCNT3      | EC:2.4.1.102 | C2GNT-3     | Forward- <i>Eco</i> RI   | ATTA GAATTC ATGGGTCAATTGAAGAGACTCTGC              |
|            |              |             | Reverse- <i>Xho</i> I    | ATTA CTCGAG AAAGGTCAGTCCCATAGATTGCC               |
| GCNT4      | EC:2.4.1.102 | C2GNT-4     | Forward- <i>Eco</i> RI   | ATTA GAATTC<br>ATGAAGATATTCAAAGGTTATTTTAAACATACCC |
|            |              |             | Reverse- <i>Xho</i> I    | ATTA CTCGAG TGATGTGGTAGTGAGATTTCTATCC             |
| B3GNT6     | EC:2.4.1.147 | C3GNT-1     | Forward- <i>Bam</i> HI   | AAAAA GGATCC ATGGCTTTTCCCTGCCGCAGGTCCC            |
|            |              |             | Reverse- <i>Xho</i> I    | AAAAA CTCGAG GGAGACCCGGTGTCCCCGG                  |
| B4GALT5    | EC:2.4.1.38  | GalT-V      | Forward- <i>Eco</i> RI   | ATTA GAATTC ATGCGCGCCCGC                          |
|            |              |             | Reverse- <i>Xho</i> I    | ATTA CTCGAG GTA CTCTGTTACCTGAGCCAGC               |
| SIAT4A     | EC:2.4.99.4  | ST3Gal-I    | Forward- <i>Bam</i> HI   | AAAAA GGATCC ATGGTGACCCTGCGGAAGAG                 |
|            |              |             | Reverse- <i>Xho</i> I    | AAAAA CTCGAG<br>TCTCCCCCTGAAGATCCGGATTTTATTG      |
| ST6GALNAC1 | EC:2.4.99.3  | ST6GalNAc-I | Forward- <i>Bam</i> HI   | AAAAA GGATCC ATGGGTCTGCTGTGGAGATGC                |
|            |              |             | Reverse- <i>Xho</i> I    | AAAAA CTCGAG GTTCTTGCTTTGGCAGTTCCGGG              |
| C1GALT1    | EC:2.4.1.122 | C1GalT-1    | Forward- <i>Bam</i> HI   | AAAAA GGATCC ATGGCCTCTAAATCCTGGCTG                |
|            |              |             | Reverse- <i>Xho</i> I    | AAAAA CTCGAG<br>AGGATTTCTAACTTCACTTTTGTATCTTC     |

Enzyme name as listed in KEGG (see [Http://www.genome.jp/kegg/pathway.html](http://www.genome.jp/kegg/pathway.html))

**Table S2.** DNA primers used for PCR amplification in domain swapping experiments

| Gene Name | Enzyme/Oligo name                   | DNA sequence                               |
|-----------|-------------------------------------|--------------------------------------------|
| ST6GAL1   | 5' XhoI ST6Gal-I-cat                | ATTA CTCGAG GGGCCAGGACCAGGC                |
|           | 3' XbaI ST6Gal-I-cat                | ATTA TCTAGA GCAGTGAATGGTCCGGAAG            |
|           | 5' HindIII ST6Gal-I <sub>tm</sub>   | ATTA AAGCTT ATGATTCACACCAACCTGAAGAAAAAG    |
|           | 3' XhoI ST6Gal-I <sub>tm</sub>      | ATTA CTCGAG GTTCATGCTTAGGTAATTCTTCCAGATC   |
| ST3GAL3   | 5' XhoI ST3Gal-IIIcat               | ATTA CTCGAG CGGGAGTTCGTGCCG                |
|           | 3' XbaI ST3Gal-IIIcat               | ATTA TCTAGA GATGCCACTGCTTAGATCAGTG         |
|           | 5' HindIII ST3Gal-III <sub>tm</sub> | ATTA AAGCTT ATGGGACTCTTGGTATTTGTGC         |
|           | 3' XhoI ST3Gal-III <sub>tm</sub>    | ATTA CTCGAG CAGGAACATGGGTGCTGG             |
| B4GALT1   | 5' XhoI GalT-Icat                   | ATTA CTCGAG ACCACCGCACTGTCCG               |
|           | 3' XbaI GalT-Icat                   | ATTA TCTAGA GCTCGGTGTCCCGATG               |
|           | 5' HindIII GalT-I <sub>tm</sub>     | ATTA AAGCTT ATGAGGCTTCGGGAGCC              |
|           | 3' XhoI GalT-I <sub>tm</sub>        | ATTA CTCGAG GTGGGGCACTGGGACC               |
| MGAT1     | 5' XhoI GlcNAcT-Icat                | ATTA CTCGAG TGCCTGGACAAGCTGC               |
|           | 3' XbaI GlcNAcT-Icat                | ATTA TCTAGA ATTCCAGCTAGGATCATAGCC          |
|           | 5' HindIII GlcNAcT-I <sub>tm</sub>  | ATTA AAGCTT ATGCTGAAGAAGCAGTCTGC           |
|           | 3' XhoI GlcNAcT-I <sub>tm</sub>     | ATTA CTCGAG GCGAACAGTGC                    |
| MGAT2     | 5' XhoI GlcNAcT-IIcat               | ATTA CTCGAG GTGGTCCAGGTGCATAACC            |
|           | 3' XbaI GlcNAcT-IIcat               | ATTA TCTAGA CTGCAGTCTTCTATAACTTTTACAGAGTTC |
|           | 5' HindIII GlcNAcT-II <sub>tm</sub> | ATTA AAGCTT ATGAGGTTCCGCATCTACAAAC         |
|           | 3' XhoI GlcNAcT-II <sub>tm</sub>    | ATTA CTCGAG CAGCACCAGCTCCCG                |
| GalNT6    | 5' XhoI ppGalNT-6cat                | ATTA CTCGAG CAGAAGAGCAAGTGGACCC            |
|           | 3' XbaI ppGalNT-6cat                | ATTA TCTAGA GACAAAGAGCCACAACCTGATG         |
|           | 5' HindIII ppGalNT-6 <sub>tm</sub>  | ATTA AAGCTT ATGAGGCTCCTCCGCAG              |
|           | 3' XhoI ppGalNT-6 <sub>tm</sub>     | ATTA CTCGAG AAATGCTTTTCCATCTGCC            |
| C1GALT1   | 5' XhoI C1GalT-1cat                 | ATTA CTCGAG ATGAGTTCAGAAGAAAATAAAGACTTC    |
|           | 3' XbaI C1GalT-1cat                 | ATTA TCTAGA AGGATTTCTAACTTCACCTTTTGTATC    |
|           | 5' HindIII C1GalT-1 <sub>tm</sub>   | ATTA AAGCTT ATGGCCTCTAAATCCTGGC            |
|           | 3' XhoI C1GalT-1 <sub>tm</sub>      | ATTA CTCGAG AAACAACACTTTGTTACAACGC         |
| GCNT1     | 5' XhoI C2GCNT-1cat                 | ATTA CTCGAG TTTCCAATAGCATATTCTATAGTGGTTC   |
|           | 3' XbaI C2GCNT-1cat                 | ATTA TCTAGA GTGTTTTAATGTCTCCAAAGCTTTG      |
|           | 5' BamHI C2GCNT-1 <sub>tm</sub>     | ATTA GGATCC ATGCTGAGGACGTTGCTG             |
|           | 3' XhoI C2GCNT-1 <sub>tm</sub>      | ATTA CTCGAG CTCCGCCTCTTCTTTACTAAGG         |

Cat: primers corresponding to the sequence of amino acids starting from 121

Tm: primers corresponding to the 120 first amino acids of the corresponding protein

**Table S3.** Heteromeric interactions between O- and N-Glycosyltransferases

|                        |             | N-glycosyltransferases |              |              |              |              |
|------------------------|-------------|------------------------|--------------|--------------|--------------|--------------|
|                        |             | GlcNAcT-I              | GlcNAcT-II   | GalT-I       | ST6Gal-I     | ST3Gal-III   |
| O-glycosyltransferases | ppGalNAcT-6 | 4,52% ± 2,63           | 2,23% ± 0,24 | 3,58% ± 1,64 | 3,02% ± 1,72 | 3,12% ± 1,86 |
|                        | C1GalT-1    | 1,40% ± 1,32           | 4,02% ± 1,99 | 0,92% ± 0,42 | 1,98% ± 0,68 | 1,72% ± 0,23 |
|                        | C2GNT-1     | 3,02% ± 0,90           | 3,84% ± 1,32 | 2,29% ± 2,12 | 4,28% ± 2,39 | 2,13% ± 1,05 |
|                        | C2GNT-3     | 0,81% ± 0,28           | 0,84% ± 0,32 | 0,67% ± 0,56 | 1,23% ± 1,12 | 1,45% ± 0,39 |
|                        | C2GNT-4     | 2,35% ± 0,87           | 4,73% ± 3,52 | 1,24% ± 0,21 | 4,01% ± 2,45 | 3,75% ± 1,29 |
|                        | ST3Gal-I    | 1,32% ± 0,67           | 3,33% ± 2,38 | 4,32% ± 0,28 | 2,32% ± 1,16 | 2,54% ± 1,53 |
|                        | ST6GalNAc-I | 2,80% ± 0,88           | 3,27% ± 0,89 | 0,92% ± 0,43 | 3,89% ± 2,57 | 2,12% ± 0,75 |
|                        | C3GNT-1     | 1,20% ± 0,28           | 0,47% ± 0,31 | 1,17% ± 0,17 | 0,61% ± 0,55 | 3,67% ± 1,62 |
|                        | GalT-V      | 1,73% ± 1,12           | 2,53% ± 1,04 | 6,12% ± 4,17 | 3,00% ± 1,67 | 3,23% ± 1,35 |

## Supplemental figures

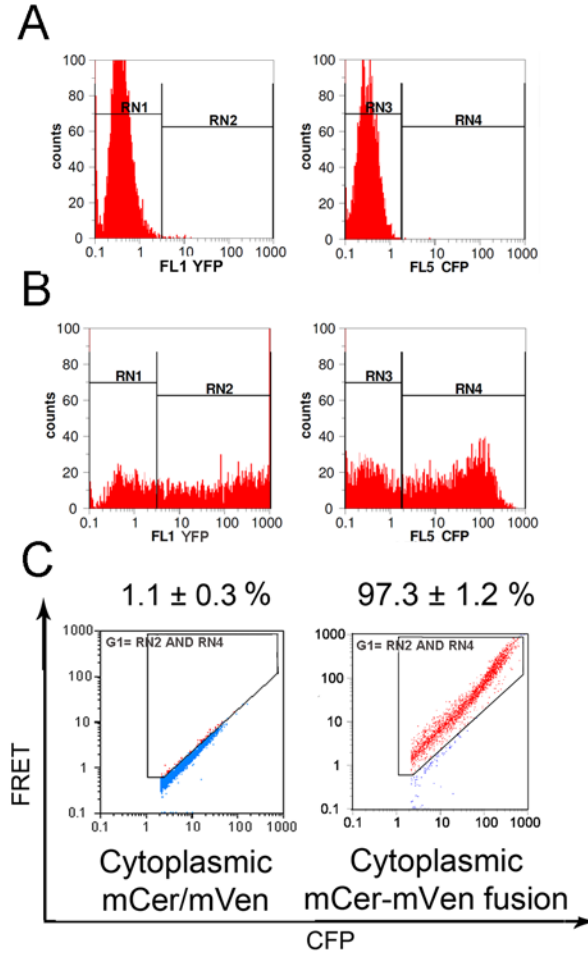

**Figure S1.** Validation of FRET settings for the flow cytometric quantification. Validation of the gates were performed according to Banning et al. and Thyrock et al. (14, 15). Briefly, COS7 cells were transfected with either mCer or mVen encoding plasmids, detached, and analyzed by flow cytometry using appropriate filter sets for mCer (405 nm excitation, 425-475 nm emission) or mVen (488 nm excitation, 515-540 nm emission). **(A)** The gates RN1 and RN3 were set to remove autofluorescence and cross-over between the channels; CFP in the YFP channel (left) and YFP in the CFP channel (right), **(B)** Cells expressing both mCer and mVen were selected using the RN2 and RN4 gates. **(C)** FRET<sup>+</sup> gate was determined by using the cytoplasmic mCer and mVen constructs (negative controls, blue dots), and their fusion protein (mCer-mVen) as a positive control (red dots, right). The fusion protein was prepared by PCR cloning of mVen in frame with mCer using *Hind*III and *Bam*HI restriction cleavage sites. This created a 33 amino acid long helical linker region (ADPLVTAASVLEFCRYPSHWRPLEHASRRSIAT) between the two fluorescent proteins. FRET signals are plotted as the ratio between mVen and mCer intensities after excitation with the 405 nm laser only (405ex, 515-540em). In each measurement,  $2.5 \times 10^3$  cells expressing both mCer and mVen were counted.

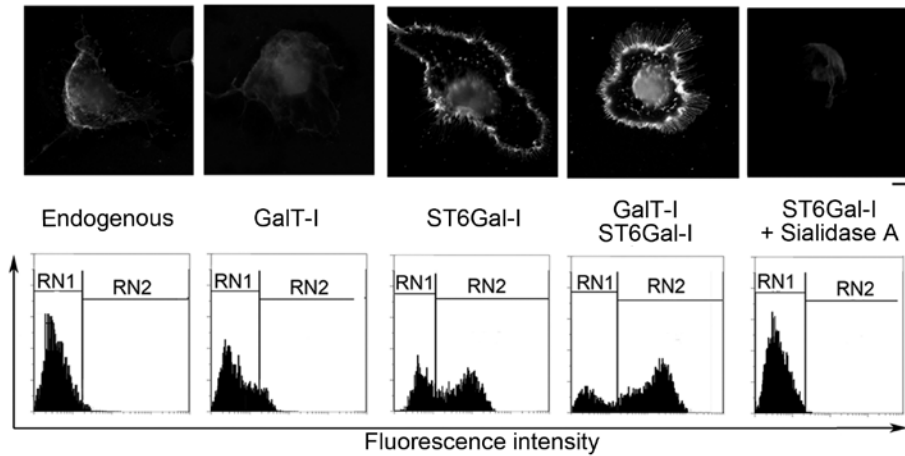

**Figure S2.** Cell surface sialic acid content in live cells. COS7 cells transfected with the plasmids that encode the indicated glycosyltransferase constructs were prepared either for fluorescence microscopy or quantification of FITC-fluorescence intensity by flow cytometry. Staining of cell surface sialic acids was performed using aminooxy-biotin and FITC-conjugated streptavidin (20). Sialidase A treatment was used to verify the specificity of the staining. RN1 gate denotes autofluorescence and RN2 gate FITC-positive cells.

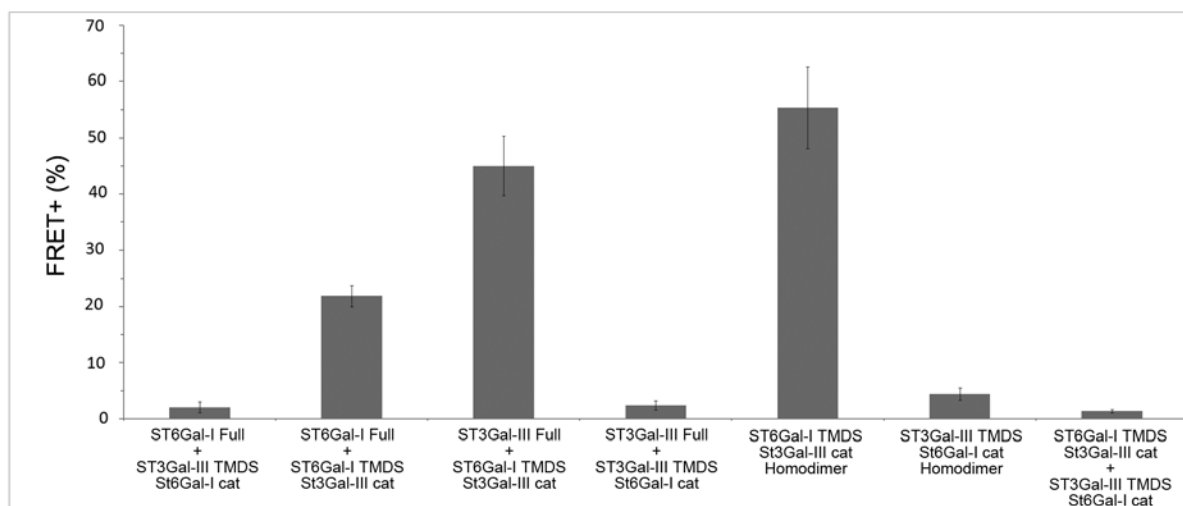

**Figure S3.** Preliminary screening of the interaction domains of ST3Gal-III and ST6Gal-I homomers. We selected these enzymes for the preliminary screening of their homomeric interaction domains because the earlier data (shown in Fig. 1) showed that these enzymes do not interact with each other. To identify the homomeric interaction domains we constructed chimeric enzymes by linking the TMDS of ST3Gal-III with the catalytic domain (cat) of ST6Gal-I, and vice versa. FRET measurements between the full length and the chimeric constructs showed that ST6Gal-I interacts only via its TMDS (the first two bars), whereas ST3Gal-III interacts only via its catalytic domain (the third and fourth bars). Cross-testing of the chimeric constructs validated these results, as the combined interacting domains gave the highest signal (the fifth bar), whereas the non-interacting domains of these two proteins gave no signal (the last two bars). The non-interacting domains of these enzymes (ST6Gal-Icat and ST3Gal-IIITMDS) were used for the screening of interaction domains in other N- and O-glycosyltransferases.

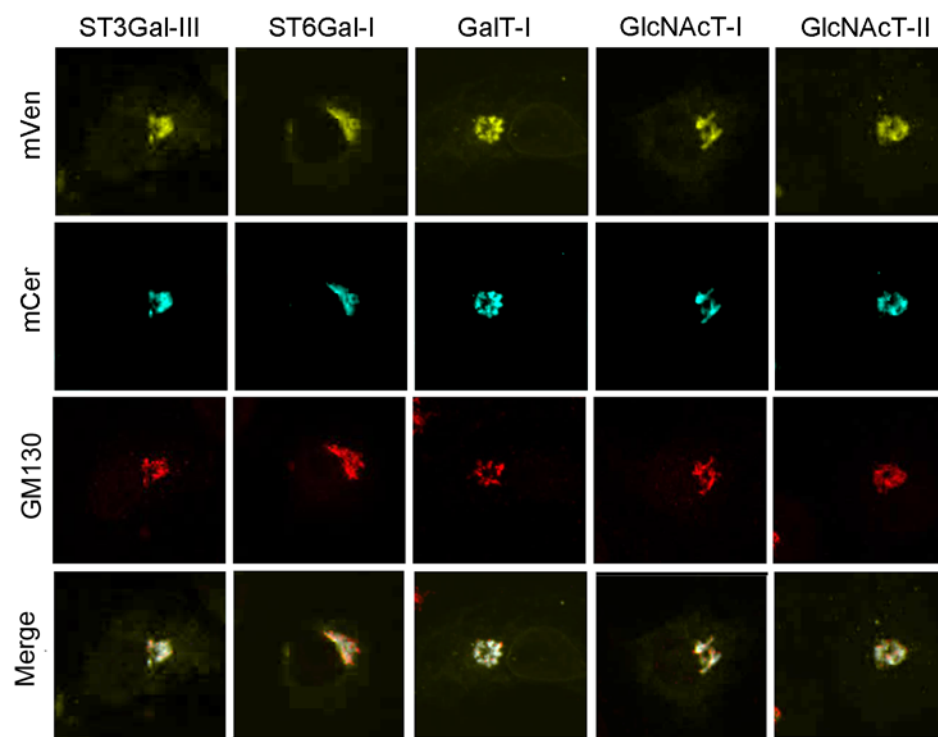

**Figure S4.** Localization of the N-glycosyltransferase FRET constructs in COS7 cells. Cells were transfected with the indicated plasmids, grown overnight, and fixed prior to staining cells with the monoclonal Golgi marker (GM130) antibody. Stained cells were visualized using appropriate filter set for mVen, mCer and Alexa Fluor 594-conjugated anti-mouse antibodies (for GM130). Both mCer and mVen fusion proteins co-localized with the Golgi marker. Scale bar 10  $\mu$ m.

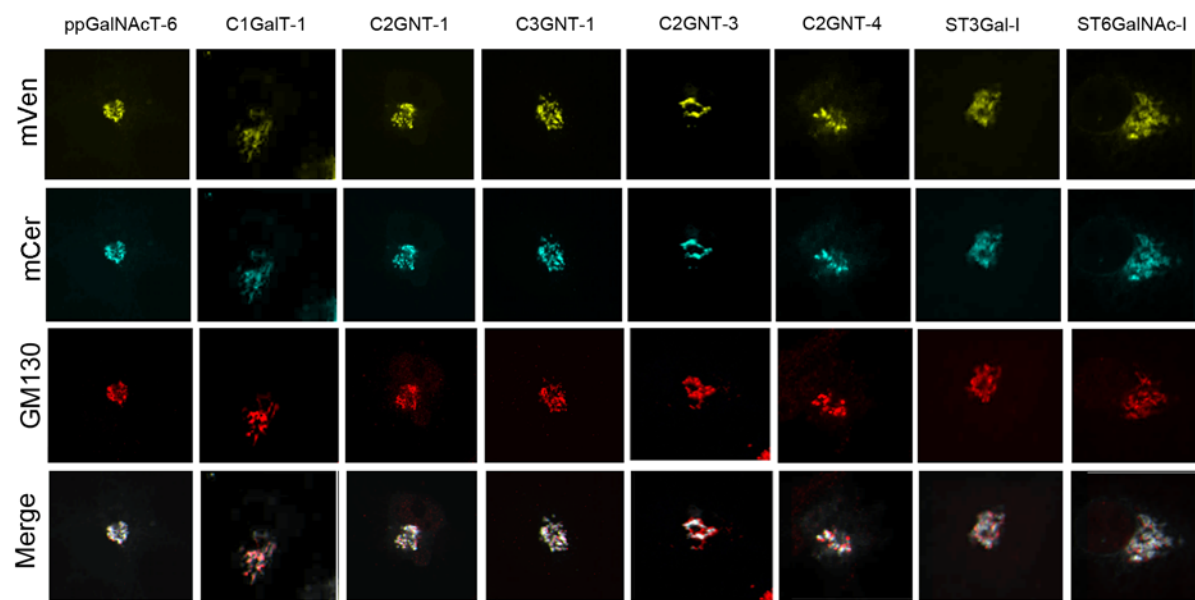

**Figure S5.** Localization of the O-glycosyltransferase FRET constructs in COS7 cells. Cells were transfected with the indicated plasmids, grown overnight, and fixed prior to staining with the monoclonal Golgi marker (GM130) antibody. Stained cells were visualized using appropriate filter set for mVen, mCer and Alexa Fluor 594-conjugated anti-mouse antibodies (for GM130). Both mCer and mVen fusion proteins co-localized with the Golgi marker. Scale bar 10  $\mu$ m.

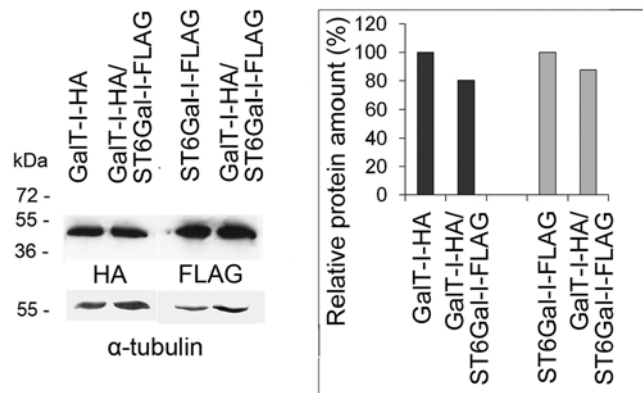

**Figure S6.** Immunoblot analyses of enzyme protein levels in the transfected cells. Cells were transfected with GalT-I-HA and ST6Gal-I-FLAG encoding plasmids either alone or together. After 24 h cells were solubilized in SDS sample buffer, subjected to SDS-PAGE and transferred to nitrocellulose sheet before immunoblotting with the anti-HA and FLAG antibodies. Quantification of the protein bands was done using ImageJ 1.43 software.  $\alpha$ -tubulin staining was used for normalization of the protein levels. Note that the protein levels rather decrease slightly than increase upon co-expression of the two constructs.

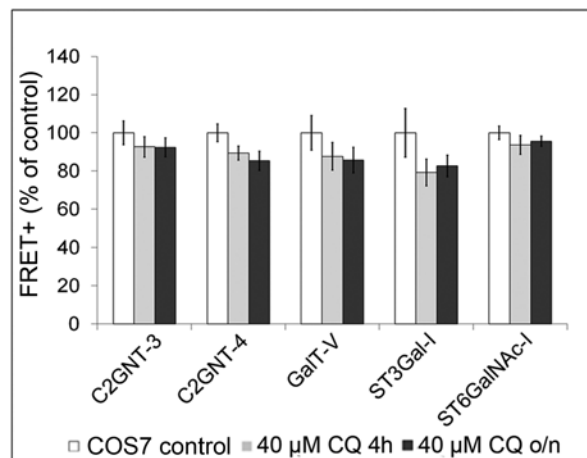

**Figure S7.** pH sensitivity of the homomeric O-glycosyltransferases. Cells were single transfected with the indicated enzyme constructs and treated or not with 40  $\mu$ M CQ for 4 h or overnight. 24 h after transfection, FRET+ cells were quantified by flow cytometry as described in Fig. 1. All the results are presented as percentages of nontreated COS7 cells (mean  $\pm$  SD, n = 3).

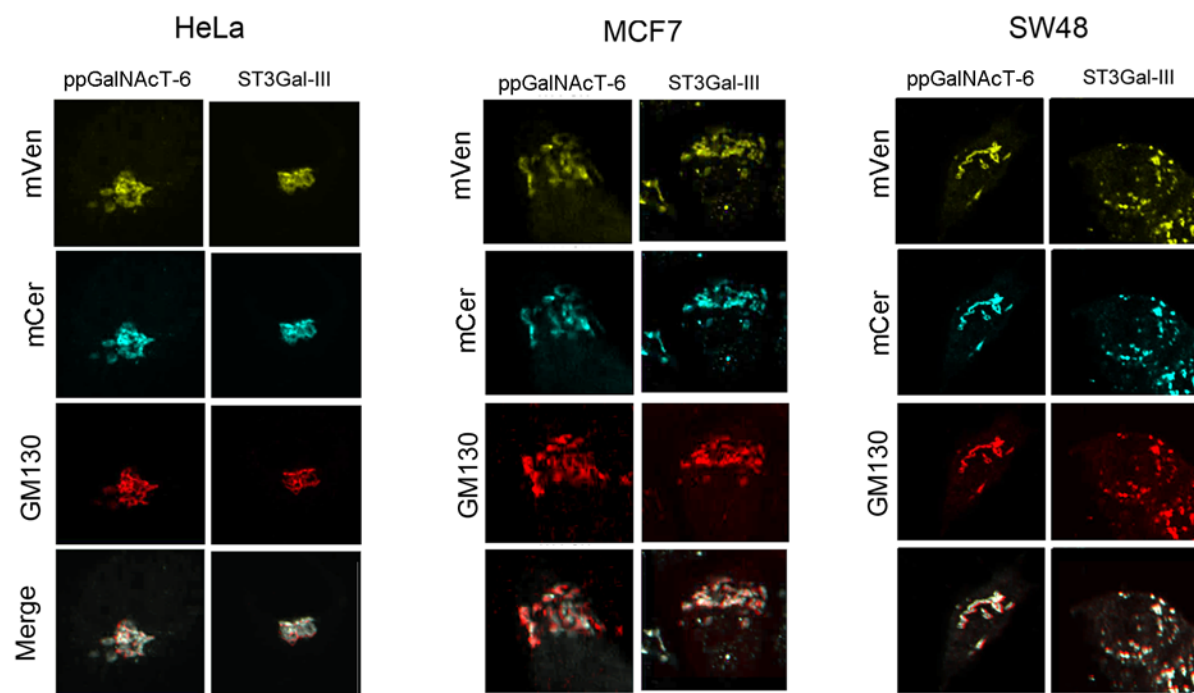

**Figure S8.** Localization of the N- and O-glycosyltransferase FRET constructs in cancer cell lines. Cells were transfected with the indicated plasmids, grown overnight, and fixed prior to staining cells with the monoclonal Golgi marker (GM130) antibody. Stained cells were visualized using appropriate filter set for mCer, mVen and Alexa Fluor 594-conjugated anti-mouse antibodies. Scale bar 10  $\mu$ m.

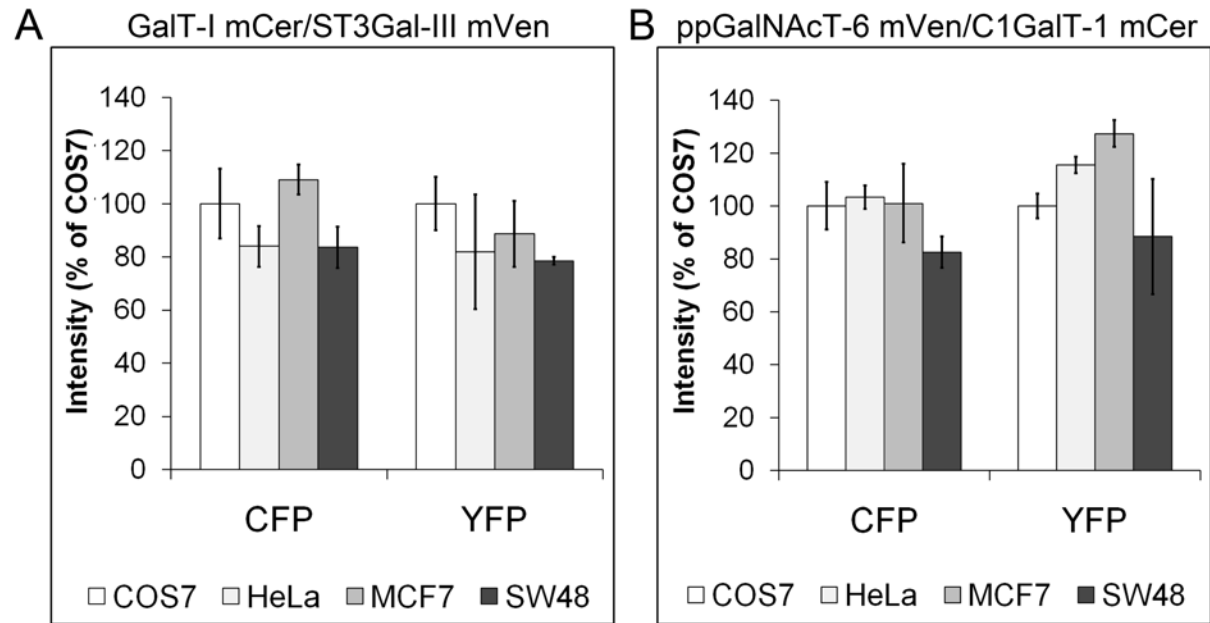

**Figure S9.** Relative CFP and YFP intensities of the co-expressed FRET constructs in different cell lines. **A)** GalT-I-mCer and ST3Gal-III-mVen. **B)** ppGalNAcT-6-mVen and C1GalT-I-mCer. Cells were transfected with the indicated enzyme constructs and analyzed by flow cytometry. Mean fluorescence intensity values (mean-x) for mCer and mVen were recorded in triplicate and presented as percentages of the intensities obtained with COS7 cells (mean  $\pm$  SD).
